# Supplementary material
Source: Springer Nature journal article supplement (https://www.springermedizin.de/resource/supplementary/12958_2010_755_MOESM1_ESM.pdf/9568408)

Ladder EP1 EP2 EP3 EP4  $\beta$ -actin water

500  
400  
300  
200  
100  
50

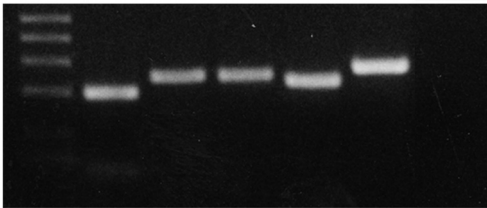

Detection

in oocytes 5/6 4/6 5/6 4/6 6/6

Supplement: MOESM1 [file 9568408]
